# Supplementary material for: The role of zero-field splitting and π-stacking interaction of different nitrogen-donor ligands on the optical properties of luminescent rhenium tricarbonyl complexes
Source: Royal Society of Chemistry journal article supplement (doi:10.1039/d1nj01544c), 2021-01-01
Supplement: d1nj01544c1.pdf [file d1nj01544c1.pdf]

## Supporting Information

# The role of zero-field splitting and $\pi$ -stacking interaction of different nitrogen-donor ligands on the optical properties of luminescent rhenium tricarbonyl complexes

Plinio Cantero-López<sup>1,2\*</sup>, Yoan Hidalgo-Rosa<sup>3,4</sup>, Zoraida Sandoval-Olivares<sup>3</sup>, Julián Santoyo-Flores<sup>3</sup>, Pablo Mella<sup>3,5</sup>, Lily Arrué<sup>3</sup>, César Zúñiga<sup>6,7</sup>, Ramiro Arratia-Pérez<sup>1,2\*</sup>, Dayán Páez-Hernández<sup>1,2\*</sup>

<sup>1</sup>Center of Applied Nanoscience (CANS), Facultad de Ciencias Exactas, Universidad Andres Bello, Av. República 330, Santiago, Chile.

<sup>2</sup>Relativistic Molecular Physics (ReMoPh) Group, Ph.D. Program in Molecular Physical Chemistry, Universidad Andres Bello, Av. República 275, Santiago, Chile.

<sup>3</sup>Doctorado en Fisicoquímica Molecular, Universidad Andres Bello. Ave. República #275, Santiago de Chile, Chile.

<sup>4</sup>ANID – Millennium Science Initiative Program- Millennium Nuclei on Catalytic Process towards Sustainable Chemistry (CSC), Chile.

<sup>5</sup>Universidad Andres Bello, Facultad de Ciencias Exactas, Departamento de Ciencias Químicas, Quillota 980, Viña del Mar, Chile.

<sup>6</sup>Instituto de Ciencias Naturales, Facultad de Medicina Veterinaria y Agronomía, Universidad de Las Américas, Sede Providencia, Manuel Montt 948, 7500972 Santiago, Chile.

<sup>7</sup>Facultad de Ciencias de la Salud, Universidad Central de Chile, Lord Cochrane 417, Santiago, Chile.

## Electron localization function (ELF)

The electron localization function (ELF)<sup>1</sup> was used as a quantum-mechanical method for the characterization of the metal–ligand bonding<sup>2,3</sup>. **Figures S4 and S5** showed the corresponding 2D plots of ELF and the electron density ( $\rho$ ) contours, located between rhenium and nitrogen atoms from denitrogenated ligands (N,N).

As represented in **Figures S4 and S5**, there are disynaptic valence and core basin around Re(I) and N/C atoms. The ELF values near the nuclei were much less than 1, indicated that the bond was not purely ionic. Therefore, it was proved to be a strong evidence of covalent bond character around the metal center. This was also confirmed by ELF values in the interstitial region, which were less than 0.2, but never zero. **Figures S4 and S5** (see supporting information) also showed that the BCP values for C-C bonds are located at the midpoint, meanwhile in N–C bonds, it shifts away from the geometrical center toward the C atom. This gave evidence of the polarization that existed in this bond, which in turn played an important role in the charge transfer phenomena, from the metal to ligand, involving in the excited states, also  $d\pi \rightarrow \pi^*$  interactions were similar as discussed in the optical properties section.

## Natural Bond Orbital (NBO) Analysis

To finally complement the study of the selected complexes Natural Bond Orbital analysis (NBO) was also performed. The calculated natural atomic charges (NAC) of the rhenium and nitrogen atoms have been listed in **Table S3** (see supporting information). This analysis showed that the charge reduction in the metal center was lower than the formal charge (+1). This was resultant of a significant charge donation from ancillary ligands, particularly chlorine and nitrogen atoms directly bound to the first coordination sphere. The calculated NAC over N-donor center was smaller and less negative than the charge on the Cl atom. I, which indicated that there was higher electron density delocalization from the N-donor center to rhenium. The fact is well described and supported by literature,<sup>4,5</sup> that each natural bond orbital (NBO)  $\sigma_{AB}$  can be expressed in terms of two directed valence hybrids (NHOs)  $h_A$  and  $h_B$  on atoms A and B such as:

$$\sigma_{AB} = c_A h_A + c_B h_B \quad (1)$$

Here,  $c_A$  and  $c_B$  are the polarization coefficients. The corresponding valence anti-bonding NBO must be:

$$\sigma_{AB}^* = c_A h_A - c_B h_B \quad (2)$$

As shown in **Table S3**, NBO analysis for the complexes under study confirmed the bond orbital for all Re–N bonds. Additionally, s, p and d orbitals of rhenium participate in the formation of Re–N bond. With a higher d character ( $\geq 75\%$  approximately). The p contribution is the most important in the nitrogen atom ( $\geq 80\%$  approximately). In the systems with monodentate triazole ligands, the  $d\pi \rightarrow \pi$  donations from Re to N atom were observed, as well as in the dinitrogenated ligands, confirming the  $\pi$  acceptor character in these ligands. Therefore, the compounds under the introduction of two nitrogen-donor ligand the  $\pi$  acceptor character increase, which in turn could help to explain the higher values in the ZFS parameter observed in these complexes.<sup>6</sup>

#### References

- 1 A. Savin, R. Nesper, S. Wengert and T. F. Fässler, *Angew. Chemie (International Ed. English)*, 1997, **36**, 1808–1832.
- 2 P. Jerabek, B. Von Der Esch, H. Schmidbaur and P. Schwerdtfeger, *Inorg. Chem.*, 2017, **56**, 14624–14631.
- 3 M. Duan, P. Li, H. Zhao, F. Xie and J. Ma, *ACS Publ.*, 2019, **58**, 3425–3434.
- 4 R. Kia and A. Kalaghchi, *Crystals*, 2020, **10**, 267.
- 5 S. Michalik, B. Machura, R. Kruszynski and J. Kusz, *J. Coord. Chem.*, 2008, **61**, 1066–1077.
- 6 M. C. Barral, D. Casanova, S. Herrero, R. Jiménez-Aparicio, M. R. Torres and F. A. Urbanos, *Chem. - A Eur. J.*, 2010, **16**, 6203–6211.

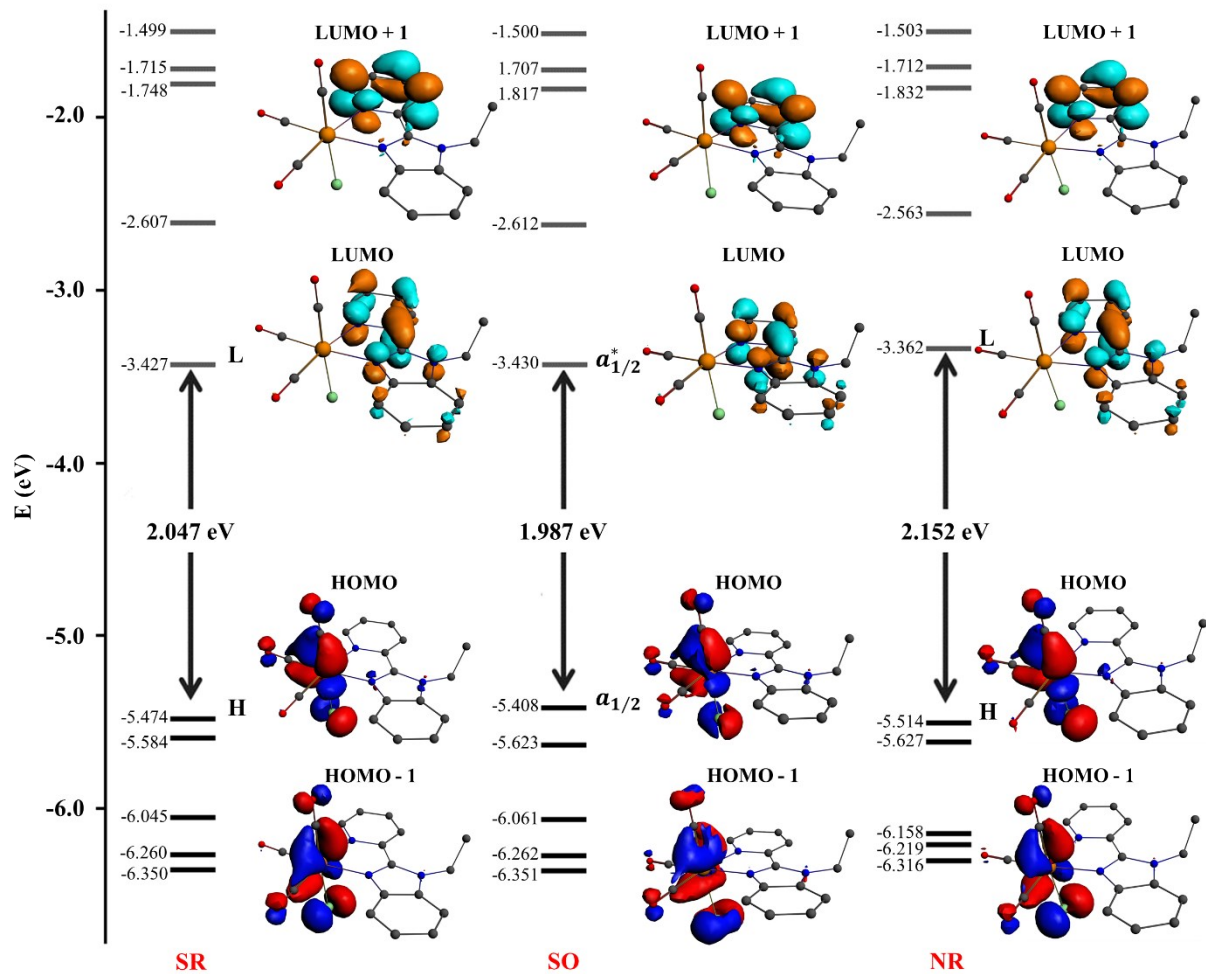

**Figure S1.** Energy levels and MOs isosurface diagrams of compound number 5 at the BP86 level

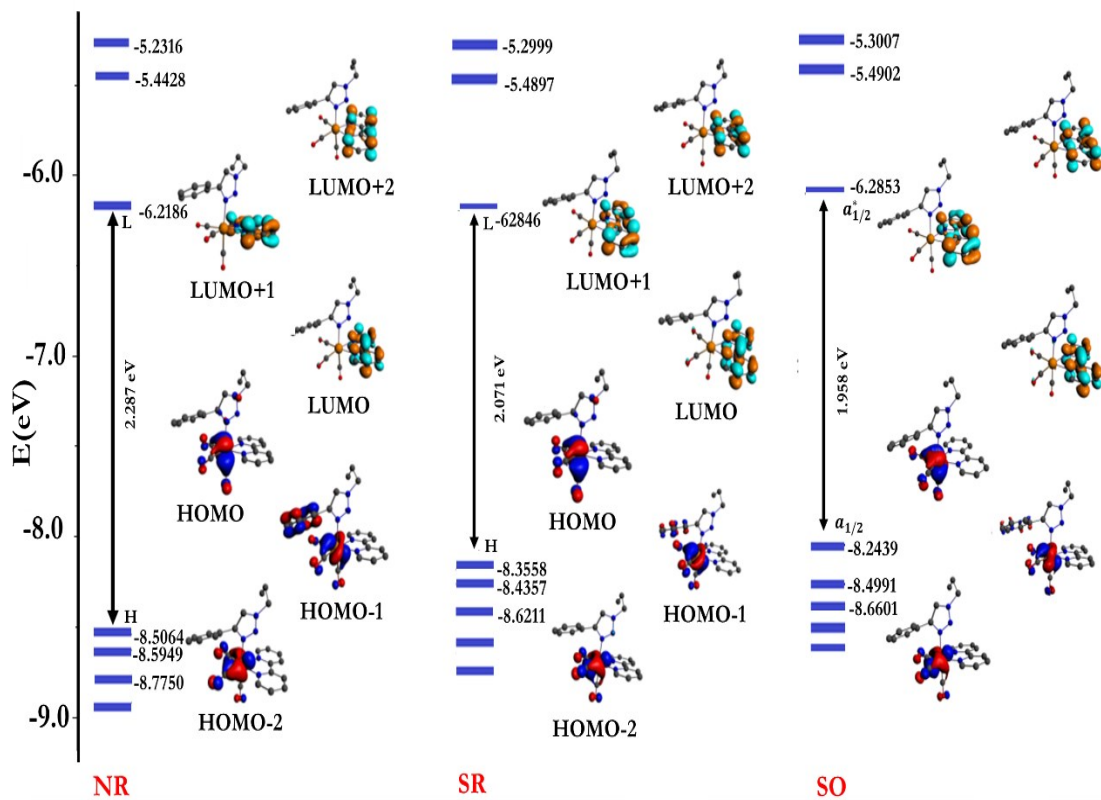

**Figure S2.** Energy levels and MOs isosurface diagrams of compound number 4 at the BP86 level

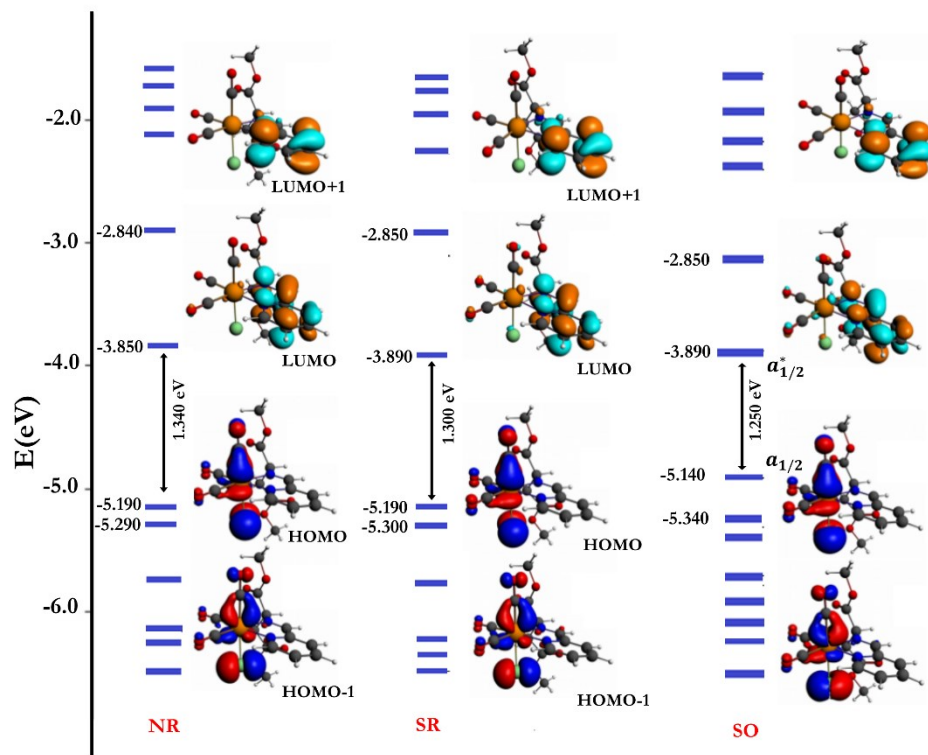

**Figure S3.** Energy levels and MOs isosurface diagrams of of compound number 2 at the BP86 level

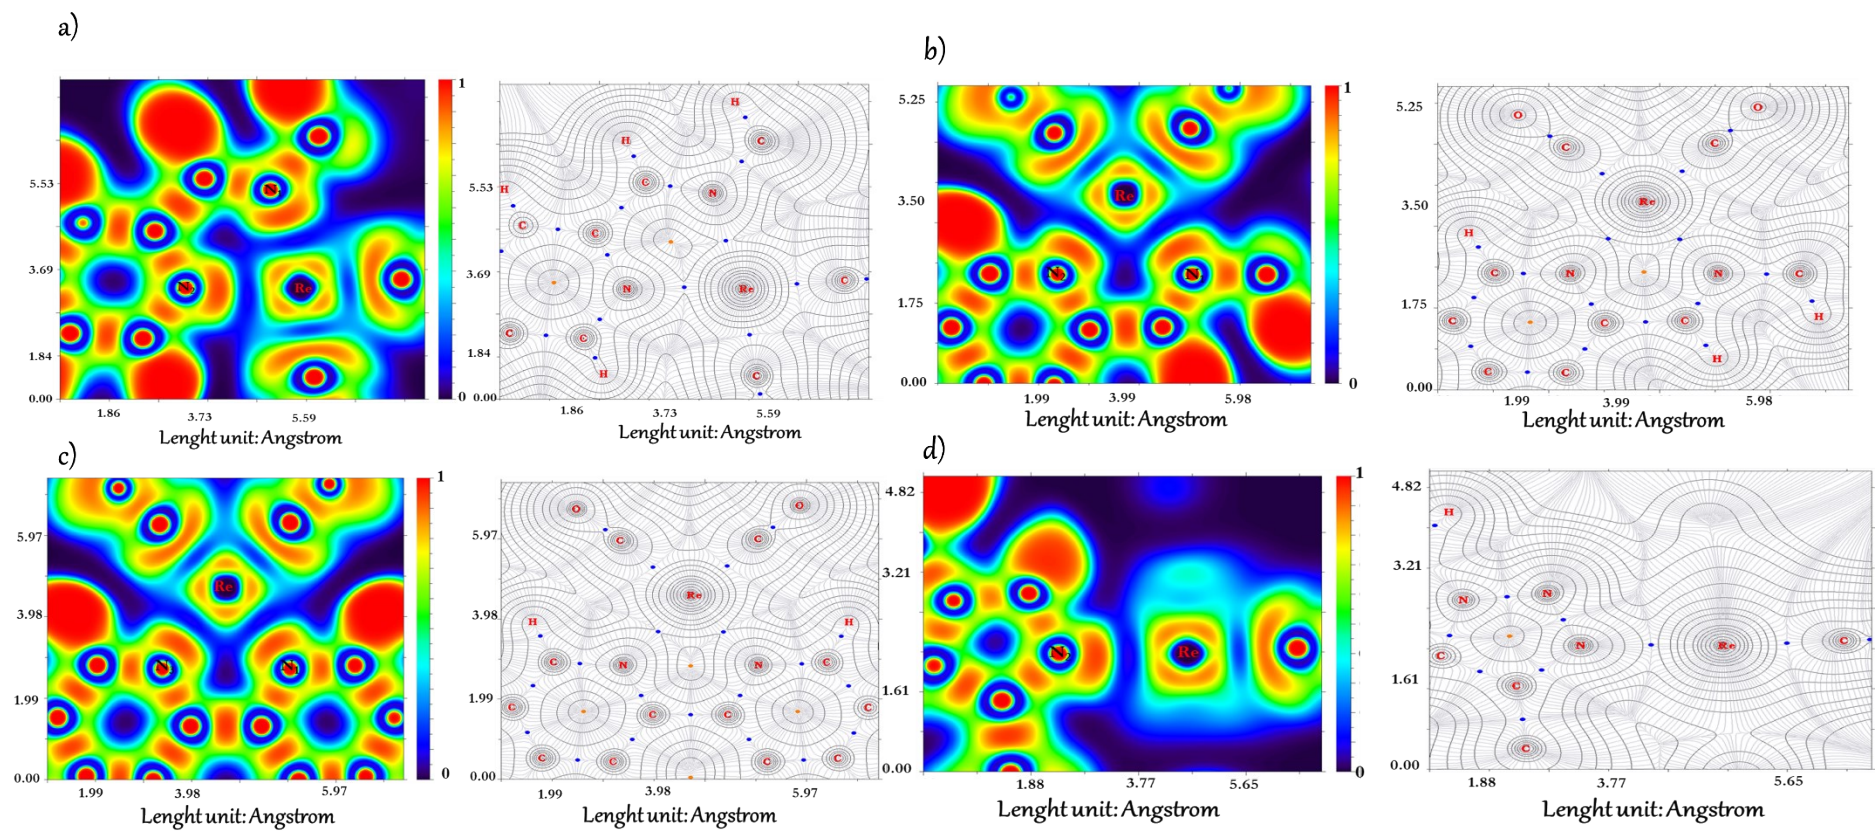

**Figure S4.** Contour plots of the electron localization function (ELF) and electron density  $\rho(r)$  for: a) 1 b) 2 c) 3 (Intersecting plane: Re, N<sub>1</sub>, N<sub>3</sub>) d) 3 (Intersecting plane: Re, N<sub>2</sub>)



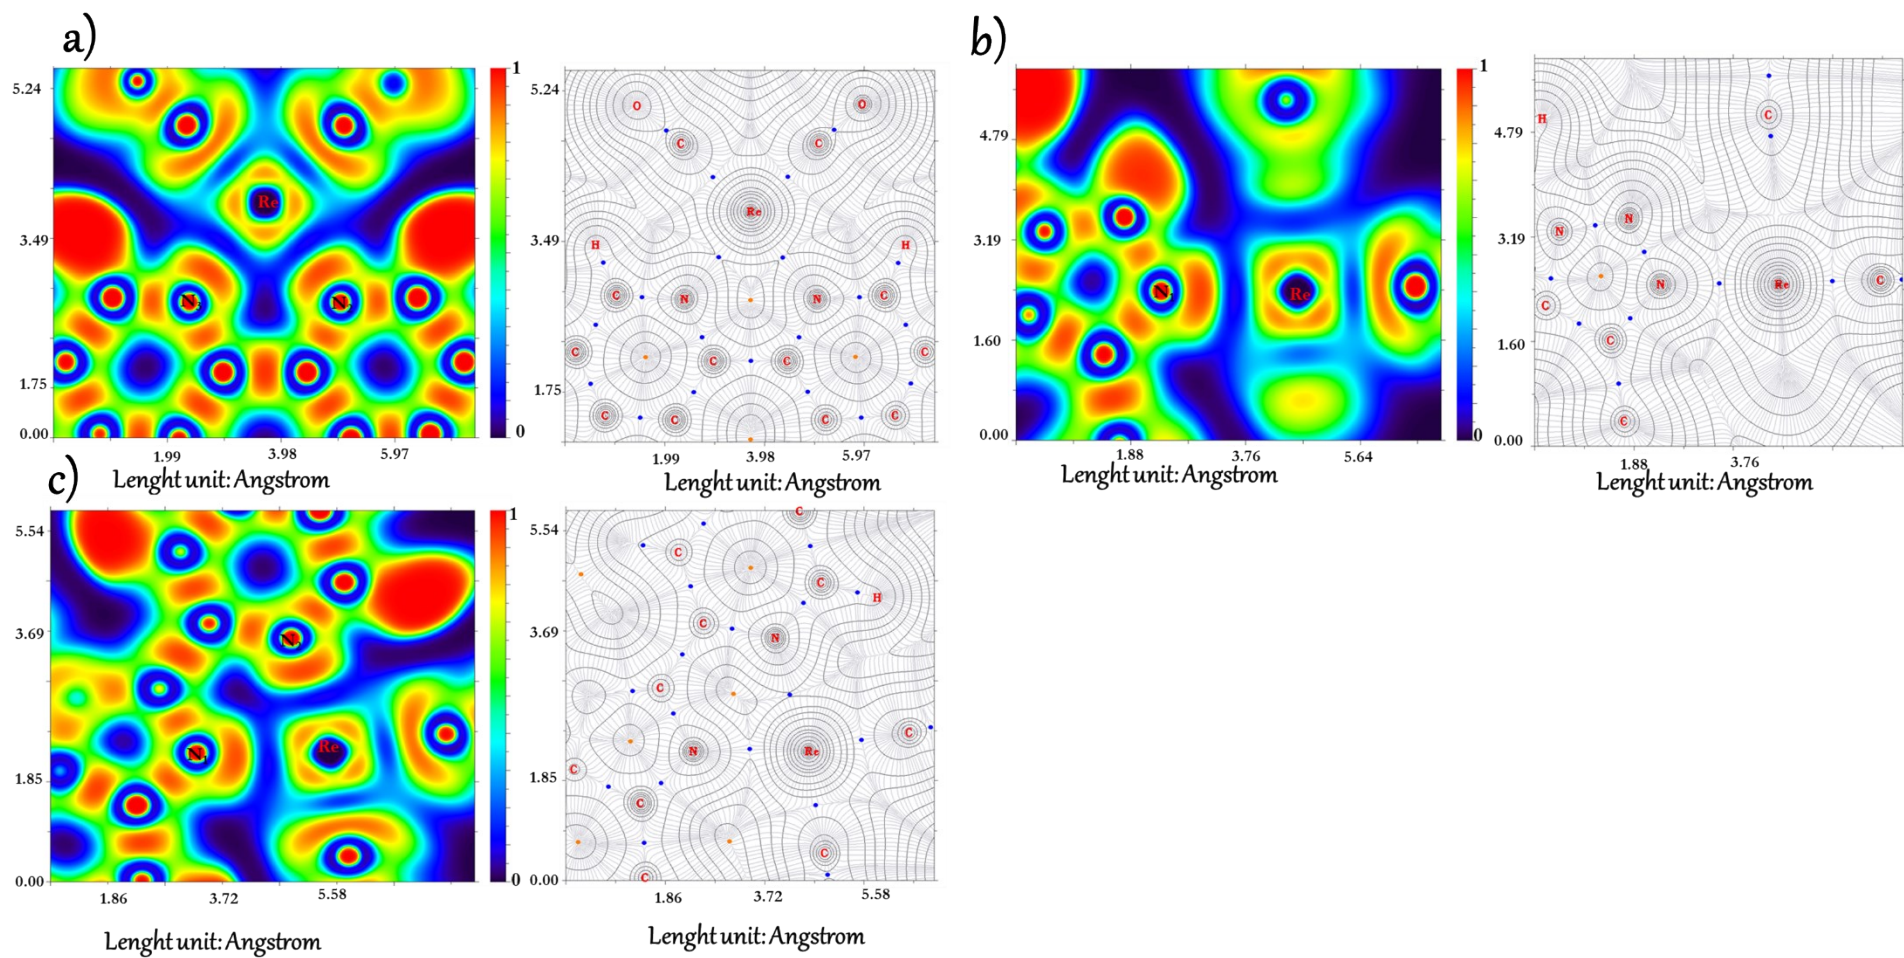

**Figure S5.** Contour plots of the electron localization function (ELF) and electron density  $\rho(r)$  for: a) 4 (Intersecting plane: Re, N<sub>1</sub>, N<sub>2</sub>) b) 4 (Intersecting plane: Re, N<sub>3</sub>) c) 5



**Table S1.** Optimized geometries for the ground state ( $S_0$ ) of the luminescent rhenium tricarbonyl complexes. All distances are in angstrom ( $\text{\AA}$ )

| Bond                                              | NR    | SR    | SO     | Literature | WBI   |
|---------------------------------------------------|-------|-------|--------|------------|-------|
| <b>1</b>                                          |       |       |        |            |       |
| Re-N <sub>1</sub>                                 | 2.192 | 2.201 | 2.159  | 2.178      | 1.132 |
| Re-N <sub>2</sub>                                 | 2.224 | 2.191 | 2.189  | 2.176      | 1.143 |
| Re-C <sub>1</sub>                                 | 1.961 | 1.922 | 1.921  | 1.910      | 1.317 |
| Re-C <sub>2</sub>                                 | 1.969 | 1.932 | 1.931  | 1.924      | 1.313 |
| Re-C <sub>3</sub>                                 | 1.962 | 1.926 | 1.925  | 1.917      | 1.318 |
| Re-Cl                                             | 2.451 | 2.473 | 2.472  | 2.482      | 0.801 |
| Re-N <sub>1</sub> -N <sub>2</sub> -Cl             |       |       | 85.464 |            |       |
| Angle                                             |       |       |        |            |       |
| C=O                                               | 1.146 | 1.143 | 1.140  | 1.156      |       |
| $\nu(\text{CO})_{\text{sym}}$                     |       | 2024  |        | 2025       |       |
| $\nu(\text{CO})_{\text{asym}}$                    |       | 1955  |        | 1925       |       |
| <b>2</b>                                          |       |       |        |            |       |
| Re-N <sub>1</sub>                                 | 2.219 | 2.190 | 2.186  | 2.187      | 1.130 |
| Re-N <sub>2</sub>                                 | 2.217 | 2.183 | 2.182  | 2.170      | 1.134 |
| Re-C <sub>1</sub>                                 | 1.960 | 1.924 | 1.923  | 1.952      | 1.193 |
| Re-C <sub>2</sub>                                 | 1.961 | 1.921 | 1.920  | 1.992      | 1.184 |
| Re-C <sub>3</sub>                                 | 1.967 | 1.993 | 1.932  | 1.897      | 1.183 |
| Re-Cl                                             | 2.450 | 2.476 | 2.474  | 2.456      | 0.807 |
| Re-N <sub>1</sub> -N <sub>2</sub> -Cl             |       |       | 59.093 |            |       |
| Angle                                             |       |       |        |            |       |
| C=O                                               | 1.157 | 1.161 | 1.161  | 1.139      |       |
| $\nu(\text{CO})_{\text{sym}}$                     |       | 2007  |        | 2028       |       |
| $\nu(\text{CO})_{\text{asym}}$                    |       | 1939  |        | 1928       |       |
| <b>3</b>                                          |       |       |        |            |       |
| Re-N <sub>1</sub>                                 | 2.207 | 2.189 | 2.188  | 2.17       | 1.131 |
| Re-N <sub>2</sub>                                 | 2.250 | 2.245 | 2.243  | 2.21       | 1.132 |
| Re-N <sub>3</sub>                                 | 2.204 | 2.187 | 2.186  | 2.17       | 1.136 |
| Re-C <sub>1</sub>                                 | 1.962 | 1.921 | 1.920  | 1.92       | 1.308 |
| Re-C <sub>2</sub>                                 | 1.952 | 1.918 | 1.917  | 1.91       | 1.316 |
| Re-C <sub>3</sub>                                 | 1.962 | 1.924 | 1.923  | 1.93       | 1.314 |
| Re-N <sub>1</sub> -N <sub>2</sub> -N <sub>3</sub> |       |       | 54.968 |            |       |
| Angle                                             |       |       |        |            |       |
| C=O                                               | 1.159 | 1.165 | 1.165  | 1.150      |       |
| $\nu(\text{CO})_{\text{sym}}$                     |       | 2028  |        | 2035       |       |
| $\nu(\text{CO})_{\text{asym}}$                    |       | 1960  |        | 1921       |       |
| <b>4</b>                                          |       |       |        |            |       |
| Re-N <sub>1</sub>                                 | 2.234 | 2.234 | 2.233  | 2.236      | 1.128 |
| Re-N <sub>2</sub>                                 | 2.205 | 2.185 | 2.185  | 2.164      | 1.130 |
| Re-N <sub>3</sub>                                 | 2.208 | 2.182 | 2.181  | 2.170      | 1.134 |
| Re-C <sub>1</sub>                                 | 1.965 | 1.931 | 1.932  | 1.915      | 1.317 |
| Re-C <sub>2</sub>                                 | 1.961 | 1.923 | 1.924  | 1.922      | 1.313 |
| Re-C <sub>3</sub>                                 | 1.975 | 1.934 | 1.935  | 1.930      | 1.315 |
| Re-N <sub>1</sub> -N <sub>2</sub> -N <sub>3</sub> |       |       | 55.108 |            |       |
| Angle                                             |       |       |        |            |       |
| C=O                                               | 1.158 | 1.160 | 1.160  | 1.155      |       |
| $\nu(\text{CO})_{\text{sym}}$                     |       | 2026  |        | 2035       |       |
| $\nu(\text{CO})_{\text{asym}}$                    |       | 1931  |        | 1923       |       |
| <b>5</b>                                          |       |       |        |            |       |

|                                       |       |       |        |       |       |
|---------------------------------------|-------|-------|--------|-------|-------|
| Re-N <sub>1</sub>                     | 2.228 | 2.209 | 2.208  | 2.184 | 1.189 |
| Re-N <sub>2</sub>                     | 2.186 | 2.161 | 2.159  | 2.129 | 1.124 |
| Re-C <sub>1</sub>                     | 1.959 | 1.919 | 1.918  | 1.840 | 1.130 |
| Re-C <sub>2</sub>                     | 1.962 | 1.922 | 1.922  | 1.848 | 1.332 |
| Re-C <sub>3</sub>                     | 1.948 | 1.909 | 1.908  | 1.92  | 1.316 |
| Re-Cl                                 | 2.469 | 2.502 | 2.501  | 2.475 | 0.822 |
| Re-N <sub>1</sub> -N <sub>2</sub> -Cl |       |       | 60.491 |       |       |
| C=O                                   | 1.160 | 1.169 | 1.170  | 1.131 |       |
| $\nu(CO)_{sym}$                       |       | 1996  |        |       |       |
| $\nu(CO)_{asym}$                      |       | 1994  |        |       |       |

\*The complexes were optimized in the solvent used experimentally to determine the optical properties via the COSMO model

\*NR=non-relativistic, SR= scalar relativistic, SO= spin-orbit, WBI= Wiberg bond index

**Table S2.** Optimized geometries for the corresponding luminescent states (S<sub>1</sub>,T<sub>1</sub>) of the rhenium tricarbonyl complexes. All distances are in angstrom (Å).

| Bond              | S <sub>0</sub> | S <sub>1</sub> | T <sub>1</sub> | Luminescence Behavior |
|-------------------|----------------|----------------|----------------|-----------------------|
|                   |                | <b>1</b>       |                |                       |
| Re-N <sub>1</sub> | 2.201          | 2.227          |                | Fluorescence          |
| Re-N <sub>2</sub> | 2.191          | 2.224          |                |                       |
| Re-C <sub>1</sub> | 1.922          | 1.942          |                |                       |
| Re-C <sub>2</sub> | 1.932          | 1.938          |                |                       |
| Re-C <sub>3</sub> | 1.926          | 1.938          |                |                       |
| Re-Cl             | 2.473          | 2.403          |                |                       |
|                   |                | <b>2</b>       |                |                       |
| Re-N <sub>1</sub> | 2.190          | 2.247          |                | Fluorescence          |
| Re-N <sub>2</sub> | 2.183          | 2.223          |                |                       |
| Re-C <sub>1</sub> | 1.924          | 1.925          |                |                       |
| Re-C <sub>2</sub> | 1.921          | 1.940          |                |                       |
| Re-C <sub>3</sub> | 1.993          | 1.946          |                |                       |
| Re-Cl             | 2.476          | 2.385          |                |                       |
|                   |                | <b>3</b>       |                |                       |
| Re-N <sub>1</sub> | 2.189          |                | 2.138          | Phosphorescence       |
| Re-N <sub>2</sub> | 2.245          |                | 2.126          |                       |
| Re-N <sub>3</sub> | 2.187          |                | 2.239          |                       |
| Re-C <sub>1</sub> | 1.921          |                | 1.945          |                       |
| Re-C <sub>2</sub> | 1.918          |                | 1.943          |                       |
| Re-C <sub>3</sub> | 1.924          |                | 1.952          |                       |
|                   |                | <b>4</b>       |                |                       |
| Re-N <sub>1</sub> | 2.234          |                | 2.210          | Phosphorescence       |
| Re-N <sub>2</sub> | 2.185          |                | 2.125          |                       |
| Re-N <sub>3</sub> | 2.182          |                | 2.124          |                       |
| Re-C <sub>1</sub> | 1.931          |                | 1.965          |                       |
| Re-C <sub>2</sub> | 1.923          |                | 1.955          |                       |
| Re-C <sub>3</sub> | 1.934          |                | 1.963          |                       |
|                   |                | <b>5</b>       |                |                       |
| Re-N <sub>1</sub> | 2.209          |                | 2.183          |                       |

|                   |       |       |                 |
|-------------------|-------|-------|-----------------|
| Re-N <sub>2</sub> | 2.161 | 2.077 | Phosphorescence |
| Re-C <sub>1</sub> | 1.919 | 1.930 |                 |
| Re-C <sub>2</sub> | 1.922 | 1.973 |                 |
| Re-C <sub>3</sub> | 1.909 | 1.944 |                 |
| Re-Cl             | 2.502 | 2.447 |                 |

\*The use of S1 and T1 for the luminescent states was a formalism to better understand the photophysical behavior of the complexes, because normally the excited SO states cannot be classified as singlets or triplets because of their highly mixed-spin characters.

**Table S3.** HOMO-LUMO Gap for NR (No Relativistic), SR (Scalar Relativistic) and SO (Spin-Orbit) calculations.

| Molecule | Gap                                         |
|----------|---------------------------------------------|
| 1        | 1.418 eV (NR), 1.371 eV (SR), 1.317 eV (SO) |
| 2        | 1.340 eV (NR), 1.300 eV (SR), 1.250 eV (SO) |
| 3        | 2.504 eV (NR), 2.720 eV (SR), 2.391 eV (SO) |
| 4        | 2.287 eV (NR), 2.071 eV (SR), 1.958 eV (SO) |
| 5        | 2.152 eV (NR), 2.047 eV (SR), 1.987 eV (SO) |

**Table S4.** The occupancies, hybridization, and natural atomic charges (NACs) for the rhenium complexes in a NBO scheme.

| BD                | Oc. <sup>a</sup> | Hybridization of NBO          | BD*                           | Oc. <sup>a</sup> | Atom           | NAC              |
|-------------------|------------------|-------------------------------|-------------------------------|------------------|----------------|------------------|
| <b>1</b>          |                  |                               |                               |                  |                |                  |
| Re-N <sub>1</sub> | 1.984            | 0.6396 (spd)Re + 0.7687 (sp)N | 0.7687 (spd)Re - 0.6396 (sp)N | 0.032            | Re             | 0.0408<br>4      |
| Re-N <sub>1</sub> | 1.711            | 0.6091 (spd)Re + 0.7931 (sp)N | 0.7931 (spd)Re - 0.6091 (sp)N | 0.526            | N <sub>1</sub> | -<br>0.3802<br>2 |
| Re-N <sub>2</sub> | 1.985            | 0.6428 (spd)Re + 0.7661 (sp)N | 0.7661 (spd)Re - 0.6428 (sp)N | 0.015            | N <sub>2</sub> | -<br>0.3344<br>4 |
| Re-N <sub>2</sub> | 1.921            | 0.6296 (spd)Re + 0.7770 (sp)N | 0.7770 (spd)Re - 0.6296 (sp)N | 0.203            | Cl             | -<br>0.5420<br>5 |
| <b>2</b>          |                  |                               |                               |                  |                |                  |
| Re-N <sub>1</sub> | 1.984            | 0.6306 (spd)Re + 0.7761 (sp)N | 0.7761 (spd)Re - 0.6306 (sp)N | 0.020            | Re             | 0.0514<br>7      |
| Re-N <sub>1</sub> | 1.752            | 0.5989 (spd)Re + 0.8008 (sp)N | 0.8008 (spd)Re - 0.5989 (sp)N | 0.420            | N <sub>1</sub> | -<br>0.3968      |

|                   |       |                                |                               |       |                |         |
|-------------------|-------|--------------------------------|-------------------------------|-------|----------------|---------|
|                   |       |                                |                               |       |                | 8       |
| Re-N <sub>2</sub> | 1.983 | 0.6391 (spd)Re + 0.7692 (sp)N  | 0.7692 (spd)Re - 0.6391 (sp)N | 0.016 | N <sub>2</sub> | 0.37309 |
| Re-N <sub>2</sub> | 1.911 | 0.6195 (spd)Re + 0.7850 (sp)N  | 0.7850 (spd)Re - 0.6195 (sp)N | 0.227 | Cl             | 0.53439 |
| <b>3</b>          |       |                                |                               |       |                |         |
| Re-N <sub>1</sub> | 1.977 | 0.6381 (spd)Re + 0.7699 (sp)N  | 0.6381 (spd)Re - 0.7699 (sp)N | 0.043 | Re             | 0.06884 |
| Re-N <sub>1</sub> | 1.711 | 0.5969 (spd)Re + 0.8023 (p)N   | 0.8023 (spd)Re - 0.5969 (sp)N | 0.579 | N <sub>1</sub> | 0.41287 |
| Re-N <sub>2</sub> | 1.978 | 0.6387 (spd)Re + 0.7694 (sp)N  | 0.7694 (spd)Re - 0.6387 (sp)N | 0.042 | N <sub>2</sub> | 0.26757 |
| Re-N <sub>2</sub> | 1.713 | 0.5967 (spd)Re + 0.8025 (sp)N  | 0.8025 (spd)Re - 0.5967 (sp)N | 0.570 | N <sub>3</sub> | 0.41392 |
| Re-N <sub>3</sub> | 1.976 | 0.6756 (spd)Re + 0.7372 (sp)N  | 0.7372 (spd)Re - 0.6756 (sp)N | 0.049 |                |         |
| Re-N <sub>3</sub> | 1.893 | 0.6233 (spd)Re + 0.7820 (sp)N  | 0.7820 (spd)Re - 0.6233 (sp)N | 0.744 |                |         |
| <b>4</b>          |       |                                |                               |       |                |         |
| Re-N <sub>1</sub> | 1.980 | 0.6376 (spd)Re + 0.7704 (sp)N  | 0.7704 (spd)Re - 0.6376 (sp)N | 0.035 | Re             | 0.06617 |
| Re-N <sub>1</sub> | 1.731 | 0.6002 (spd)Re + 0.7998 (sp)N  | 0.7998 (spd)Re - 0.6002 (sp)N | 0.530 | N <sub>1</sub> | 0.27389 |
| Re-N <sub>2</sub> | 1.980 | 0.6377 (spd)Re + 0.7703 (sp)N  | 0.7703 (spd)Re - 0.6377 (sp)N | 0.035 | N <sub>2</sub> | 0.41655 |
| Re-N <sub>2</sub> | 1.728 | 0.6009 (spd)Re + 0.7993 (sp)N  | 0.7993 (spd)Re - 0.6009 (sp)N | 0.531 | N <sub>3</sub> | 0.41187 |
| Re-N <sub>3</sub> | 1.983 | 0.6776 (spd)Re + 0.7355 (sp)N  | 0.7355 (spd)Re - 0.6776 (sp)N | 0.048 |                |         |
| Re-N <sub>3</sub> | 1.896 | 0.6264 (spd)Re + 0.7795 (sp)N  | 0.7795 (spd)Re - 0.6264 (sp)N | 0.753 |                |         |
| <b>5</b>          |       |                                |                               |       |                |         |
| Re-N <sub>1</sub> | 1.981 | 0.5098 (spd) Re + 0.8603 (sp)N | 0.8603 (spd)Re - 0.5098 (sp)N | 0.043 | Re             | 0.06072 |
| Re-N <sub>1</sub> | 1.850 | 0.6155 (spd) Re + 0.7882 (sp)N | 0.7882 (spd)Re - 0.6155 (sp)N | 0.688 | N <sub>1</sub> | 0.41084 |
| Re-N <sub>2</sub> | 1.976 | 0.6378 (spd) Re + 0.7702       | 0.7702 (spd)Re -              | 0.029 | N <sub>2</sub> | -       |

|                   |       |                                |                               |       |    |        |
|-------------------|-------|--------------------------------|-------------------------------|-------|----|--------|
|                   |       | (sp)N                          | 0.6378 (sp)N                  |       |    | 0.3920 |
|                   |       |                                |                               |       |    | 4      |
| Re-N <sub>2</sub> | 1.705 | 0.5856 (spd) Re + 0.8106 (sp)N | 0.8106 (spd)Re - 0.5856 (sp)N | 0.657 | Cl | 0.5283 |
|                   |       |                                |                               |       |    | 3      |

<sup>a</sup>Occupancy, BD denotes 2-center bond, \* –denotes antibond NBO.

**Table S5.** Topological parameters of electron density derived from the Bader's theory of AIM: electron density ( $\rho(r)$ ), Hessian eigenvalues, potential energy density  $V(r)$ , total energy densities  $H(r)$  and lagrangian kinetic energy ( $G(r)$ ) at the bond critical points (BCPs).

| Bonds             | $\rho(r)$ | $V(r)$  | $G(r)$ | $H(r)$  | $ V/G $ |
|-------------------|-----------|---------|--------|---------|---------|
| <b>1</b>          |           |         |        |         |         |
| Re-N <sub>1</sub> | 0.0824    | -0.1188 | 0.1023 | -0.0665 | 1.1613  |
| Re-N <sub>2</sub> | 0.0817    | -0.1197 | 0.1045 | -0.0660 | 1.1455  |
| Re-C <sub>1</sub> | 0.1467    | -0.2517 | 0.1955 | -0.1249 | 1.2875  |
| Re-C <sub>2</sub> | 0.1414    | -0.2413 | 0.1905 | -0.1158 | 1.2667  |
| Re-C <sub>3</sub> | 0.1435    | -0.2460 | 0.1936 | -0.1177 | 1.2707  |
| Re-Cl             | 0.0592    | -0.0647 | 0.0561 | -0.0362 | 1.1533  |
| <b>2</b>          |           |         |        |         |         |
| Re-N <sub>1</sub> | 0.0771    | -0.1088 | 0.0944 | -0.0605 | 1.1525  |
| Re-N <sub>2</sub> | 0.0781    | -0.1130 | 0.0943 | -0.0611 | 1.1983  |
| Re-C <sub>1</sub> | 0.1434    | -0.2424 | 0.1898 | -0.1200 | 1.2771  |
| Re-C <sub>2</sub> | 0.1450    | -0.2393 | 0.1884 | -0.1163 | 1.2702  |
| Re-C <sub>3</sub> | 0.1468    | -0.2511 | 0.1945 | -0.1252 | 1.2910  |
| Re-Cl             | 0.0564    | -0.0605 | 0.0526 | -0.0326 | 1.1502  |
| <b>3</b>          |           |         |        |         |         |
| Re-N <sub>1</sub> | 0.0801    | -0.1155 | 0.1007 | -0.0630 | 1.1470  |
| Re-N <sub>2</sub> | 0.0803    | -0.1158 | 0.1006 | -0.0615 | 1.1511  |
| Re-N <sub>3</sub> | 0.0676    | -0.0957 | 0.0867 | -0.0487 | 1.1038  |
| Re-C <sub>1</sub> | 0.1402    | -0.2407 | 0.1909 | -0.1111 | 1.2609  |
| Re-C <sub>2</sub> | 0.1395    | -0.2368 | 0.1876 | -0.1123 | 1.2623  |
| Re-C <sub>3</sub> | 0.1398    | -0.2365 | 0.1873 | -0.1122 | 1.2627  |
| <b>4</b>          |           |         |        |         |         |
| Re-N <sub>1</sub> | 0.0812    | -0.1175 | 0.1021 | -0.0621 | 1.1508  |
| Re-N <sub>2</sub> | 0.0806    | -0.1162 | 0.1012 | -0.0636 | 1.1482  |
| Re-N <sub>3</sub> | 0.0698    | -0.0092 | 0.0896 | -0.0511 | 1.1071  |
| Re-C <sub>1</sub> | 0.1377    | -0.2328 | 0.1847 | -0.1118 | 1.2604  |



|                   |        |         |        |         |        |
|-------------------|--------|---------|--------|---------|--------|
| Re-C <sub>2</sub> | 0.1410 | -0.2410 | 0.1904 | -0.1124 | 1.2658 |
| Re-C <sub>3</sub> | 0.1390 | -0.2343 | 0.1861 | -0.1134 | 1.2590 |
| 5                 |        |         |        |         |        |
| Re-N <sub>1</sub> | 0.0773 | -0.1114 | 0.0979 | -0.0608 | 1.1379 |
| Re-N <sub>2</sub> | 0.0843 | -0.1217 | 0.1051 | -0.0719 | 1.1579 |
| Re-C <sub>1</sub> | 0.1422 | -0.2395 | 0.1880 | -0.1191 | 1.2739 |
| Re-C <sub>2</sub> | 0.1418 | -0.2396 | 0.1881 | -0.1187 | 1.2738 |
| Re-C <sub>3</sub> | 0.1428 | -0.2425 | 0.1894 | -0.1197 | 1.2804 |
| Re-Cl             | 0.0610 | -0.0673 | 0.0582 | -0.0380 | 1.1564 |

**Table S6** . Cartesian coordinates of **1** at the ZORA/BP86/TZ2P level of theory.

|    |              |              |              |
|----|--------------|--------------|--------------|
| Re | 14.211600000 | 2.116580000  | 3.950320000  |
| Cl | 12.917530000 | 2.973910000  | 2.012910000  |
| N  | 15.350890000 | 1.090810000  | 2.405520000  |
| N  | 13.119280000 | 0.271690000  | 3.565480000  |
| C  | 15.537680000 | -0.948530000 | 1.158780000  |
| C  | 13.641120000 | -0.516270000 | 2.712190000  |
| C  | 17.148420000 | 0.779150000  | 0.856130000  |
| C  | 16.691660000 | -0.492560000 | 0.550130000  |
| C  | 11.870130000 | -0.144310000 | 4.212090000  |
| C  | 10.713920000 | 0.817090000  | 3.907760000  |
| C  | 14.889090000 | -0.132790000 | 2.056050000  |
| O  | 15.995150000 | 4.607810000  | 4.199380000  |
| O  | 15.785730000 | 0.800150000  | 6.214970000  |
| C  | 15.208400000 | 1.302190000  | 5.360840000  |
| C  | 15.327730000 | 3.675550000  | 4.103070000  |
| O  | 12.376160000 | 3.378790000  | 6.071000000  |
| O  | 9.648550000  | 1.906540000  | 2.141490000  |
| O  | 10.603450000 | -0.079950000 | 1.684840000  |
| C  | 16.465920000 | 1.543390000  | 1.789180000  |
| C  | 13.057500000 | 2.902500000  | 5.263860000  |
| C  | 10.339390000 | 0.802180000  | 2.453010000  |
| C  | 9.305290000  | 2.094210000  | 0.737410000  |
| H  | 11.613030000 | -1.063710000 | 3.929500000  |
| H  | 9.982570000  | 0.481040000  | 4.387660000  |
| H  | 10.029130000 | 1.707350000  | 0.167210000  |
| H  | 17.159370000 | -0.982400000 | -0.083610000 |
| H  | 16.748310000 | 2.337440000  | 1.989830000  |
| H  | 10.944940000 | 1.822530000  | 4.297370000  |
| H  | 11.997330000 | -0.149050000 | 5.200320000  |
| H  | 15.212040000 | -1.720900000 | 0.936390000  |
| H  | 17.900270000 | 1.097580000  | 0.367870000  |
| H  | 13.224710000 | -1.375370000 | 2.441310000  |
| C  | 9.165130000  | 3.582730000  | 0.518360000  |
| H  | 8.948540000  | 3.739910000  | -0.468200000 |
| H  | 8.407910000  | 1.531200000  | 0.551800000  |

|   |              |             |             |
|---|--------------|-------------|-------------|
| H | 10.037420000 | 4.099000000 | 0.685570000 |
| H | 8.330530000  | 3.983820000 | 0.969830000 |

**Table S7.** Cartesian coordinates of **2** at the ZORA/BP86/TZ2P level of theory.

|    |              |              |              |
|----|--------------|--------------|--------------|
| C  | 3.540720000  | 1.154300000  | 0.415586000  |
| C  | 1.720350000  | 2.515880000  | 1.877210000  |
| C  | 4.242270000  | 3.410720000  | 1.675490000  |
| C  | 6.569080000  | 1.247900000  | 2.640460000  |
| H  | 6.652020000  | 2.228660000  | 2.181820000  |
| C  | 7.704260000  | 0.549712000  | 3.053010000  |
| H  | 8.683240000  | 1.000360000  | 2.911650000  |
| C  | 7.561850000  | -0.707925000 | 3.637970000  |
| H  | 8.431270000  | -1.271320000 | 3.968930000  |
| C  | 6.278900000  | -1.230890000 | 3.789250000  |
| H  | 6.110830000  | -2.207350000 | 4.236850000  |
| C  | 5.185660000  | -0.479521000 | 3.353170000  |
| C  | 3.826640000  | -0.959974000 | 3.459350000  |
| H  | 3.640130000  | -1.942110000 | 3.896370000  |
| C  | 1.493390000  | -0.756345000 | 3.173360000  |
| H  | 1.570690000  | -1.791420000 | 3.539890000  |
| C  | 0.681854000  | 0.040691000  | 4.189310000  |
| H  | 0.793363000  | 1.121200000  | 4.040610000  |
| H  | -0.382426000 | -0.192677000 | 4.049850000  |
| C  | 1.057540000  | -0.309814000 | 5.615450000  |
| C  | 0.787669000  | 0.318040000  | 7.888730000  |
| H  | 0.383471000  | -0.655830000 | 8.184590000  |
| H  | 0.283355000  | 1.124720000  | 8.423850000  |
| H  | 1.866720000  | 0.345920000  | 8.073740000  |
| C  | 0.769827000  | -0.869609000 | 1.820420000  |
| C  | 0.969058000  | -1.669740000 | -0.402991000 |
| H  | 0.123350000  | -2.357800000 | -0.304081000 |
| H  | 1.763840000  | -2.114420000 | -1.003930000 |
| H  | 0.633564000  | -0.723557000 | -0.839218000 |
| Cl | 3.421110000  | 2.521560000  | 4.616280000  |
| N  | 5.326610000  | 0.752893000  | 2.781710000  |
| N  | 2.857720000  | -0.218434000 | 3.024080000  |
| O  | 3.610500000  | 0.826270000  | -0.705666000 |
| O  | 0.678834000  | 2.992800000  | 1.657090000  |
| O  | 4.748800000  | 4.406630000  | 1.342020000  |
| O  | 1.734320000  | -1.272390000 | 5.946720000  |
| O  | 0.517047000  | 0.566928000  | 6.480710000  |
| O  | -0.395045000 | -0.563927000 | 1.640530000  |
| O  | 1.568860000  | -1.431850000 | 0.903905000  |
| Re | 3.451060000  | 1.750980000  | 2.227720000  |

**Table S8.** Cartesian coordinates of **3** at the ZORA/BP86/TZ2P level of theory.

|    |              |             |              |
|----|--------------|-------------|--------------|
| Re | 15.248030000 | 1.778120000 | 13.296640000 |
| C  | 14.537110000 | 6.532510000 | 11.316700000 |
| H  | 13.572030000 | 6.940790000 | 11.612250000 |
| C  | 15.246570000 | 5.729520000 | 12.210340000 |
| H  | 14.843540000 | 5.537520000 | 13.201840000 |

|   |              |              |              |
|---|--------------|--------------|--------------|
| H | 19.529500000 | -2.035830000 | 11.313680000 |
| O | 15.515300000 | 1.231570000  | 16.325840000 |
| O | 12.990000000 | 3.806820000  | 13.864050000 |
| N | 15.316680000 | 1.942430000  | 11.116970000 |
| N | 16.803520000 | 0.381250000  | 12.651580000 |
| N | 16.949770000 | 3.239780000  | 13.420210000 |
| N | 17.917590000 | 2.851770000  | 14.240510000 |
| N | 18.883290000 | 3.768560000  | 14.158460000 |
| C | 15.074520000 | 6.834030000  | 10.062810000 |
| O | 13.046220000 | -0.382500000 | 13.175230000 |
| H | 14.525240000 | 7.473410000  | 9.372930000  |
| C | 14.474510000 | 2.706460000  | 10.388980000 |
| H | 13.752570000 | 3.290160000  | 10.952580000 |
| C | 14.509680000 | 2.752880000  | 9.001060000  |
| H | 13.799540000 | 3.381060000  | 8.468770000  |
| C | 15.459530000 | 1.987800000  | 8.325730000  |
| H | 15.518520000 | 2.001580000  | 7.238960000  |
| C | 16.327080000 | 1.192570000  | 9.066710000  |
| H | 17.063780000 | 0.576180000  | 8.559800000  |
| C | 16.235370000 | 1.174830000  | 10.462190000 |
| C | 17.068610000 | 0.316190000  | 11.315970000 |
| C | 18.053020000 | -0.544880000 | 10.819030000 |
| H | 18.254900000 | -0.586940000 | 9.752650000  |
| C | 18.768010000 | -1.356740000 | 11.692800000 |
| C | 13.858430000 | 3.059760000  | 13.660900000 |
| C | 18.485320000 | -1.288150000 | 13.056920000 |
| H | 19.010490000 | -1.908310000 | 13.779740000 |
| C | 17.504900000 | -0.406690000 | 13.493700000 |
| H | 17.256770000 | -0.318120000 | 14.547220000 |
| C | 20.086610000 | 3.630560000  | 14.973040000 |
| H | 20.203330000 | 4.512240000  | 15.611570000 |
| H | 20.963450000 | 3.519380000  | 14.326320000 |
| H | 19.963700000 | 2.739420000  | 15.592660000 |
| C | 18.554770000 | 4.752590000  | 13.288530000 |
| H | 19.187660000 | 5.609280000  | 13.096100000 |
| C | 17.300240000 | 4.423540000  | 12.807010000 |
| C | 16.498390000 | 5.207680000  | 11.851040000 |
| C | 17.038620000 | 5.525320000  | 10.594120000 |
| H | 18.016840000 | 5.134980000  | 10.314300000 |
| C | 16.328840000 | 6.332970000  | 9.705370000  |
| H | 16.760050000 | 6.577350000  | 8.735790000  |
| C | 13.874430000 | 0.426790000  | 13.212230000 |
| C | 15.399740000 | 1.462170000  | 15.194080000 |

**Table S9.** Cartesian coordinates of **4** at the ZORA/BP86/TZ2P level of theory.

|    |             |             |              |
|----|-------------|-------------|--------------|
| Re | 1.408448960 | 3.496295850 | 9.524621950  |
| C  | 2.681933990 | 4.427954790 | 10.644330590 |
| H  | 3.688703030 | 9.580031550 | 11.371750000 |
| C  | 4.359258960 | 8.369978230 | 9.714996650  |
| C  | 3.403268320 | 8.857519040 | 10.608585510 |
| H  | 4.742360410 | 7.057511040 | 8.046443610  |

|   |              |              |              |
|---|--------------|--------------|--------------|
| C | 3.994353380  | 7.443893620  | 8.738570130  |
| H | 5.391868020  | 8.709036320  | 9.779050350  |
| O | -0.923720880 | 5.263768020  | 10.506864770 |
| O | 0.900345650  | 1.630489810  | 11.934814130 |
| O | 3.484517070  | 4.880573410  | 11.350116250 |
| C | -0.019923980 | 4.620688480  | 10.153892220 |
| N | 2.829942760  | 2.114487060  | 8.605203770  |
| N | 0.211408540  | 2.212306780  | 8.227957390  |
| C | 2.668093160  | 6.990942890  | 8.651039750  |
| C | 1.709691530  | 7.497670800  | 9.541685800  |
| H | 0.670776110  | 7.185911870  | 9.457367510  |
| C | 1.091536140  | 2.322657290  | 11.025678000 |
| C | 2.323219370  | 1.185713530  | 7.745106970  |
| C | 0.866688640  | 1.223813360  | 7.555835660  |
| C | -1.129921420 | 2.299163820  | 8.107368880  |
| H | -1.608324550 | 3.100183310  | 8.663580160  |
| C | -1.874827840 | 1.420315230  | 7.331544600  |
| H | -2.955017720 | 1.535228640  | 7.278281320  |
| C | -1.213026790 | 0.401812040  | 6.646386060  |
| H | -1.764516300 | -0.312001800 | 6.037200680  |
| C | 0.169745510  | 0.307627040  | 6.762088470  |
| H | 0.703774060  | -0.483981480 | 6.244295430  |
| C | 3.159573250  | 0.260393580  | 7.111595080  |
| H | 2.742834370  | -0.475146320 | 6.429626770  |
| C | 4.527874340  | 0.279809030  | 7.358557960  |
| H | 5.185071130  | -0.439091880 | 6.872681250  |
| C | 5.037160990  | 1.231832440  | 8.241715650  |
| H | 6.098582990  | 1.285268550  | 8.472834210  |
| C | 4.159515710  | 2.126336490  | 8.840289000  |
| H | 4.514400930  | 2.879452770  | 9.538365320  |
| N | 1.788389190  | 4.775978320  | 7.733341700  |
| N | 1.594957490  | 4.218730560  | 6.544628810  |
| N | 1.977804200  | 5.112933160  | 5.631604010  |
| C | 1.900659300  | 4.787992570  | 4.198913860  |
| H | 1.625253770  | 3.728089520  | 4.157904900  |
| H | 2.911988960  | 4.898669820  | 3.787675890  |
| C | 0.900299080  | 5.652511140  | 3.424744110  |
| H | 1.181684820  | 6.711978090  | 3.522745110  |
| H | 1.035067040  | 5.401595030  | 2.361948210  |
| C | -0.559989600 | 5.444876970  | 3.832464940  |
| H | -0.868588440 | 4.400273260  | 3.683027450  |
| H | -1.221241830 | 6.078892320  | 3.228488300  |
| H | -0.729229930 | 5.700779390  | 4.887696150  |
| C | 2.419995210  | 6.252281190  | 6.218111200  |
| H | 2.763877060  | 7.113087230  | 5.659679420  |
| C | 2.300050730  | 6.048319020  | 7.580179350  |
| C | 2.079145660  | 8.423030300  | 10.517169170 |
| H | 1.327143150  | 8.811000710  | 11.202088060 |

**Table S10.** Cartesian coordinates of **5** at the ZORA/BP86/TZ2P level of theory.

|    |             |             |             |
|----|-------------|-------------|-------------|
| Re | 6.754697000 | 1.531667000 | 4.223235000 |
| Cl | 8.471440000 | 3.289339000 | 4.464830000 |
| N  | 6.711526000 | 2.293576000 | 8.415085000 |

|   |             |              |              |
|---|-------------|--------------|--------------|
| N | 6.945718000 | 1.411210000  | 6.371191000  |
| O | 4.500169000 | -0.578525000 | 4.092694000  |
| O | 8.835418000 | -0.621563000 | 3.469237000  |
| O | 6.217440000 | 2.302343000  | 1.281327000  |
| C | 7.677661000 | 0.644185000  | 7.246549000  |
| C | 8.464993000 | -0.490423000 | 7.025619000  |
| H | 8.582734000 | -0.898294000 | 6.025382000  |
| C | 9.083502000 | -1.058622000 | 8.133583000  |
| H | 9.703413000 | -1.943547000 | 8.002812000  |
| C | 8.929711000 | -0.515258000 | 9.429283000  |
| H | 9.430360000 | -0.994842000 | 10.268467000 |
| C | 8.152234000 | 0.617403000  | 9.660330000  |
| H | 8.032200000 | 1.030709000  | 10.660542000 |
| C | 7.532319000 | 1.185604000  | 8.544471000  |
| C | 6.368256000 | 2.384068000  | 7.088169000  |
| C | 5.481137000 | 3.304921000  | 6.408520000  |
| C | 4.689564000 | 4.296573000  | 7.003096000  |
| H | 4.708138000 | 4.451200000  | 8.075316000  |
| C | 3.855292000 | 5.077753000  | 6.209639000  |
| H | 3.237092000 | 5.850543000  | 6.663752000  |
| C | 3.820086000 | 4.849514000  | 4.832535000  |
| H | 3.185094000 | 5.435523000  | 4.171937000  |
| C | 4.617637000 | 3.841519000  | 4.303657000  |
| H | 4.625634000 | 3.619085000  | 3.239950000  |
| N | 5.428344000 | 3.076142000  | 5.057167000  |
| C | 6.333015000 | 3.154563000  | 9.529141000  |
| H | 6.353849000 | 4.194094000  | 9.182106000  |
| H | 7.128199000 | 3.057145000  | 10.278014000 |
| C | 4.981484000 | 2.769009000  | 10.130473000 |
| H | 4.734075000 | 3.440794000  | 10.964555000 |
| H | 5.016381000 | 1.737364000  | 10.505623000 |
| H | 4.183490000 | 2.830804000  | 9.378048000  |
| C | 5.356636000 | 0.215975000  | 4.142806000  |
| C | 8.048997000 | 0.198982000  | 3.727583000  |
| C | 6.455536000 | 1.980042000  | 2.376239000  |
